# Supplementary material for: The Body Status of Manganese and Activity of This Element-Dependent Mitochondrial Superoxide Dismutase in a Rat Model of Human Exposure to Cadmium and Co-Administration of Aronia melanocarpa L. Extract
Source: MDPI journal article supplement (doi:10.3390/nu14224773), 2022-11-11
Supplement: s1 [file s1]

## Supplementary Material

**Supplementary Table S1.** Analytical quality of the measurements of Mn and Cd in certified reference materials.

| Kind of Certified Reference Material                                                                                                    | Reference Values <sup>1</sup> | Noticed Values <sup>1</sup> | Recovery | Precision (CV) <sup>2</sup> |
|-----------------------------------------------------------------------------------------------------------------------------------------|-------------------------------|-----------------------------|----------|-----------------------------|
| Analytical Quality of Mn Measurements                                                                                                   |                               |                             |          |                             |
| Trace Elements Serum L-1<br>LOT 0903106 (SERO AS,<br>Billingstad, Norway)                                                               | 15.0 ± 0.9 µg/L               | 14.6 ± 0.6 µg/L             | 97%      | 4.1%                        |
| Trace Elements Urine L-2<br>(LOT 1011645; SERO AS,<br>Billingstad, Norway)                                                              | 10.9 ± 2.2 µg/L               | 10.4 ± 0.4 µg/L             | 95%      | 3.8%                        |
| Standard Reference Material<br>Bovine Liver (no. 1577b; National<br>Institute of Standards and<br>Technology, Gaithersburg, MD,<br>USA) | 10.5 ± 1.7 µg/g               | 11.5 ± 0.4 µg/g             | 109%     | 3.5%                        |
| Certified Reference Material BCR<br>Pig Kidney (BCR-186; Institute for<br>Reference Materials and<br>Measurements, Geel, Belgium)       | 8.5 ± 0.3 µg/g                | 8.3 ± 0.3 µg/g              | 98%      | 3.6%                        |
| Standard Reference Bone Ash<br>(no. 1400; National Institute of<br>Standards and Technology,<br>Gaithersburg, MD, USA)                  | 17 µg/g                       | 16.5 ± 0.3 µg/g             | 97%      | 1.8%                        |
| Analytical Quality of Cd Measurements                                                                                                   |                               |                             |          |                             |
| Standard Reference Material<br>Bovine Liver (no. 1577b; National<br>Institute of Standards and<br>Technology, Gaithersburg, MD,<br>USA) | 0.50 ± 0.03 µg/g              | 0.517 ± 0.025<br>µg/g       | 103%     | 4.8%                        |
| Certified Reference Material BCR<br>Pig Kidney (BCR-186; Institute for<br>Reference Materials and<br>Measurements, Geel, Belgium)       | 2.71 ± 0.15 µg/g              | 2.63 ± 0.17 µg/g            | 97%      | 6.5%                        |

<sup>1</sup> Data are represented as mean ± SD for three measurements. <sup>2</sup> Precision of measurements is expressed as a CV.

**Supplementary Table S2.** The daily intake of Mn with diet in particular experimental groups during the 5-day balance study <sup>3,4,5,6</sup>.

| Group    | Mn Intake (mg/24 h) |             |             |             |
|----------|---------------------|-------------|-------------|-------------|
|          | 3 Months            | 10 Months   | 17 Months   | 24 Months   |
| Control  | 3.581               | 2.310***    | 2.736***    | 3.318*      |
|          | 3.379–3.756         | 2.208–2.712 | 2.388–2.856 | 3.168–3.684 |
| AE       | 3.567               | 2.508***    | 2.586***    | 3.204**     |
|          | 3.321–3.799         | 2.280–2.556 | 2.388–2.796 | 3.048–3.468 |
| Cd1      | 3.539               | 2.460***    | 2.568***    | 3.372       |
|          | 3.306–3.770         | 2.328–2.652 | 2.400–2.736 | 3.228–3.696 |
| Cd1 + AE | 3.473               | 2.478***    | 2.514***    | 3.384       |
|          | 3.306–3.582         | 2.268–2.736 | 2.400–2.850 | 3.024–3.948 |
| Cd5      | 3.509               | 2.490***    | 2.520***    | 3.348       |
|          | 3.364–3.698         | 2.364–2.640 | 2.280–2.616 | 3.180–3.972 |
| Cd5 + AE | 3.582               | 2.394***    | 2.508***    | 3.252*      |
|          | 3.408–3.683         | 2.352–2.496 | 2.400–2.676 | 2.952–3.840 |

<sup>3</sup> The rats received 0.1% aqueous extract from the berries of *Aronia melanocarpa* L. (AE) or not and Cd in the diet at the concentration of 0, 1, and 5 mg/kg. <sup>4</sup> The study was performed in the last week of the 3rd, 10th, 17th, and 24th months of the experiment. <sup>5</sup> The intake of Mn was calculated based on this element concentration in the Labofeed diets declared by the manufacturer. The Labofeed H diet (administered throughout the first 3 months of the study) contained 145 mg Mn/kg, whereas the Labofeed B diet (used thereafter) contained 120 mg Mn/kg. <sup>6</sup> Data represent a median and minimum and maximum values for 8 rats (except for 7 animals in the AE, Cd1, and Cd5 groups after 24 months). \*  $p < 0.05$ , \*\*  $p < 0.01$ , \*\*\*  $p < 0.001$  compared to the intake in the last week of the 3rd month.

**Supplementary Table S3.** The daily intake of Mn with 0.1% AE <sup>7,8,9</sup>.

| Group                       | Experiment Duration     |                            |                            |                            |
|-----------------------------|-------------------------|----------------------------|----------------------------|----------------------------|
|                             | 3 Months                | 10 Months                  | 17 Months                  | 24 Months                  |
| Mn Intake (µg/24 h)         |                         |                            |                            |                            |
| Control                     | -                       | -                          | -                          | -                          |
| AE                          | 0.0173<br>0.0161–0.0179 | 0.0163<br>0.0135–0.0184    | 0.0164<br>0.0148–0.0174    | 0.0158<br>0.0150–0.0190    |
| Cd1                         | -                       | -                          | -                          | -                          |
| Cd1 + AE                    | 0.0169<br>0.0155–0.0183 | 0.0160<br>0.0149–0.0173    | 0.0167<br>0.0154–0.0174    | 0.0169<br>0.0153–0.0186    |
| Cd5                         | -                       | -                          | -                          | -                          |
| Cd5 + AE                    | 0.0170<br>0.0157–0.0182 | 0.0169<br>0.0142–0.0183    | 0.0169<br>0.0148–0.0181    | 0.0163<br>0.0139–0.0190    |
| Mn Intake (µg/kg b.w./24 h) |                         |                            |                            |                            |
| Control                     | -                       | -                          | -                          | -                          |
| AE                          | 0.0560<br>0.0521–0.0579 | 0.0376***<br>0.0313–0.0426 | 0.0317***<br>0.0286–0.0337 | 0.0278***<br>0.0264–0.0335 |
| Cd1                         | -                       | -                          | -                          | -                          |
| Cd1 + AE                    | 0.0563<br>0.0515–0.0608 | 0.0361***<br>0.0336–0.0390 | 0.0332***<br>0.0306–0.0354 | 0.0294***<br>0.0267–0.0324 |
| Cd5                         | -                       | -                          | -                          | -                          |
| Cd5 + AE                    | 0.0538<br>0.0497–0.0576 | 0.0403***<br>0.0339–0.0437 | 0.0335***<br>0.0292–0.0358 | 0.0294***<br>0.0251–0.0343 |

<sup>7</sup> The intake of Mn was calculated based on this element concentration determined in the 0.1% AE ( $0.396 \pm 0.039$  µg/L).

<sup>8</sup> Data represent a median value and minimum and maximum intake of Mn for 32, 24, 16, and 8 rats during 3, 10, 17, and 24 months, respectively, except for 7 animals in the AE group in the last time-point of the experiment. \*\*\*  $p < 0.001$  compared to the intake during 3 months. <sup>9</sup> The intake of Mn in the control, Cd1, and Cd5 groups was recognized to be 0.

**Supplementary Table S4.** The impact of AE on the body retention of Mn in the rats exposed to Cd <sup>6</sup>.

| Group    | Mn Body Retention (%) |               |               |               |
|----------|-----------------------|---------------|---------------|---------------|
|          | 3 Months              | 10 Months     | 17 Months     | 24 Months     |
| Control  | 57.590                | 55.923        | 54.248        | 56.263        |
|          | 55.104–61.262         | 47.055–58.113 | 48.646–63.559 | 52.241–59.065 |
| AE       | 58.088                | 49.423        | 53.592        | 55.714        |
|          | 53.098–61.114         | 44.458–59.769 | 47.905–61.362 | 50.317–61.110 |
| Cd1      | 49.974***             | 47.263*       | 56.841        | 57.981        |
|          | 44.834–52.735         | 40.075–57.098 | 46.983–64.791 | 56.642–58.666 |
| Cd1 + AE | 51.466***             | 47.766        | 56.119        | 57.361        |
|          | 46.298–55.527         | 44.879–59.794 | 46.444–61.190 | 52.809–64.792 |
| Cd5      | 49.339***             | 61.811** ‡‡   | 50.007†       | 65.156*** ‡   |
|          | 41.513–52.998         | 55.796–69.270 | 47.084–57.491 | 57.870–67.279 |
| Cd5 + AE | 54.097** †            | 56.887† ‡     | 52.266        | 58.268†       |
|          | 48.210–55.610         | 51.496–65.481 | 45.809–58.865 | 50.846–66.432 |

<sup>6</sup> Data represent a median and minimum and maximum values for 8 rats (except for 7 animals in the AE, Cd1, and Cd5 groups after 24 months). Statistically significant differences: \*  $p < 0.05$ , \*\*  $p < 0.01$ , \*\*\*  $p < 0.001$  vs. control group; †  $p < 0.05$  vs. Cd5 group; ‡  $p < 0.05$ , ‡‡  $p < 0.01$ , ‡‡‡  $p < 0.001$  vs. respective group receiving the 1 mg Cd/kg diet alone (Cd1 group) or with the AE (Cd1 + AE group) are marked.

**Supplementary Table S5.** The impact of AE on the total body burden of Mn in rats exposed to Cd <sup>6</sup>.

| Group    | Total Body Burden of Mn (µg) |                                      |               |                         |
|----------|------------------------------|--------------------------------------|---------------|-------------------------|
|          | 3 Months                     | 10 Months                            | 17 Months     | 24 Months               |
| Control  | 20.440                       | 18.680                               | 23.040        | 24.264                  |
|          | 16.795–22.838                | 14.769–22.563                        | 21.237–28.332 | 21.475–32.024           |
| AE       | 19.034                       | 19.056                               | 23.380        | 25.850                  |
|          | 17.579–20.051                | 15.448–24.511                        | 22.067–27.885 | 21.954–30.949           |
| Cd1      | 17.982                       | 19.997                               | 22.897        | 25.280                  |
|          | 16.193–29.498                | 18.041–21.114                        | 18.864–30.315 | 20.304–29.516           |
| Cd1 + AE | 18.647                       | 19.206                               | 24.886        | 28.400                  |
|          | 15.353–21.400                | 16.060–21.558                        | 18.984–26.749 | 23.198–33.592           |
| Cd5      | 17.630                       | 23.873*** <sup>‡‡</sup>              | 22.620        | 36.020*** <sup>‡‡</sup> |
|          | 16.705–20.074                | 18.831–26.297<br>↑ 28% <sup>10</sup> | 17.630–26.491 | 29.023–39.095<br>↑ 48%  |
| Cd5 + AE | 19.078                       | 19.240 <sup>‡‡</sup>                 | 21.351        | 22.432 <sup>‡‡‡</sup> † |
|          | 16.945–22.298                | 17.007–20.611<br>↓ 19%               | 18.399–32.971 | 17.731–32.619<br>↓ 38%  |

<sup>6</sup> Data represent a median and minimum and maximum values for 8 rats (except for 7 animals in the AE, Cd1, and Cd5 groups after 24 months). Statistically significant differences: \*\*\* $p < 0.001$  vs. control group; <sup>‡‡</sup> $p < 0.001$  vs. Cd5 group; <sup>†</sup> $p < 0.05$ , <sup>‡‡</sup> $p < 0.001$  vs. respective group receiving the 1 mg Cd/kg diet alone (Cd1 group) or with the AE (Cd1 + AE group) are marked. <sup>10</sup> Percentage change compared to the control group (↑, increase) or the respective group receiving Cd alone (↓, decrease).
